# Supplementary material for: An oncogenic mutant of RHEB, RHEB Y35N, exhibits an altered interaction with BRAF resulting in cancer transformation
Source: Springer Nature journal article supplement (doi:10.1186/s12885-017-3938-5), 2018-01-10

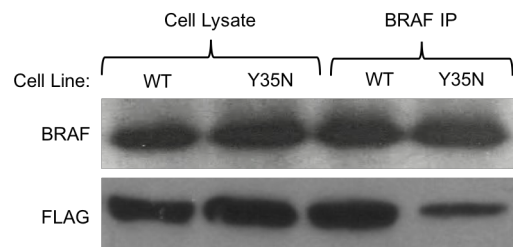

Supplement: MOESM1 [file 15356090]
