# Supplementary material for: An oncogenic mutant of RHEB, RHEB Y35N, exhibits an altered interaction with BRAF resulting in cancer transformation
Source: Springer Nature journal article supplement (doi:10.1186/s12885-017-3938-5), 2018-01-10

### Rheb WT Normal Growth

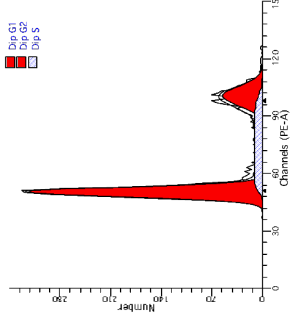

### Rheb Y35N Normal Growth

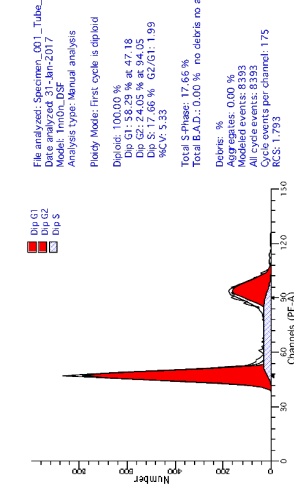

### Kras G12V Normal Growth

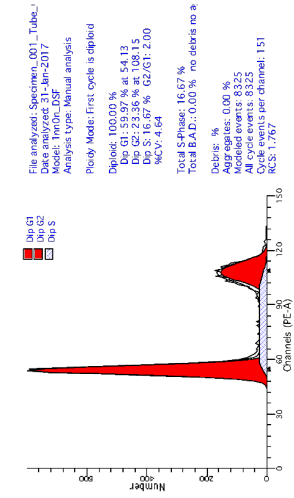

### Ctrl Normal Growth

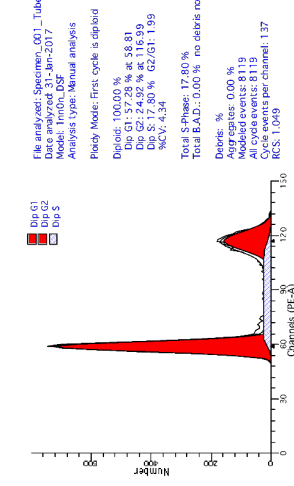

### Rheb WT Serum Starved

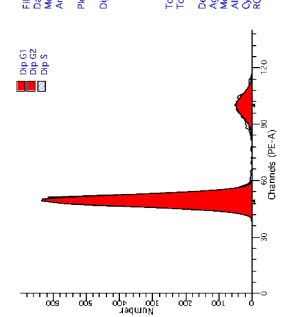

### Rheb Y35N Serum Starved

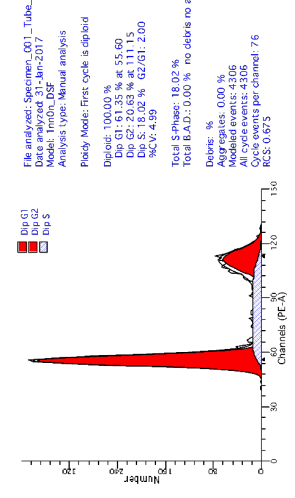

### Kras G12V Serum Starved

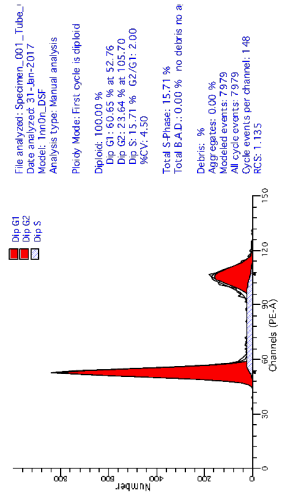

### Ctrl Serum Starved

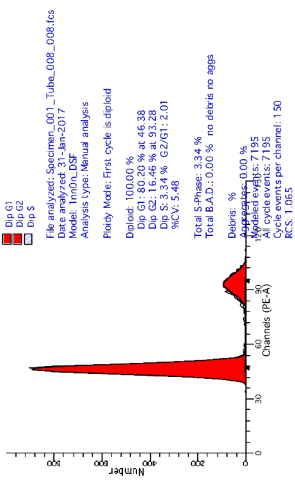

Supplement: MOESM2 [file 15356090]
